# Supplementary material for: Structure of genipin in solution: a combined experimental and theoretical study
Source: Royal Society of Chemistry journal article supplement (doi:10.1039/c3ra42147c), 2013-01-01
Supplement: c3ra42147c.pdf [file c3ra42147c.pdf]

## Structure of genipin in solution: a combined experimental and theoretical study

Stefania Di Tommaso, Priscilla David, Karine Picolet, Marion Gabant, Hervé David, Jean-Luc Morañais, Jérôme Gomar, Frédéric Leroy, Carlo Adamo

### SUPPLEMENTARY INFORMATION

Table S1. Activation Gibbs free energies ( $\Delta G^\ddagger$ , kcal/mol) and products stabilization ( $\Delta G$ , kcal/mol) calculated for the ring-opening ( $1 \rightarrow 2'$ ) and tautomerization ( $2' \rightarrow 2$ ) reactions of genipin in the gas phase and in ethanol. Explicit solvent molecules have been also considered.

|           | REACTANTS                                      | $\Delta G^\ddagger$ | $\Delta G$ |
|-----------|------------------------------------------------|---------------------|------------|
| GAS PHASE | <b>1</b>                                       | 46.6                | 13.0       |
|           | <b>1 + H<sub>2</sub>O</b>                      | 27.7                | 14.1       |
|           | <b>1 + 2H<sub>2</sub>O</b>                     | 18.5                | 4.0        |
| ETHANOL   | <b>1 + 2H<sub>2</sub>O</b>                     | 17.6                | 4.5        |
| GAS PHASE | <b>2'</b>                                      | 55.8                | -5.6       |
|           | <b>2' + H<sub>2</sub>O</b>                     | 34.6                | 2.7        |
|           | <b>2' + 2H<sub>2</sub>O</b>                    | 27.8                | -0.9       |
|           | <b>2' + 2H<sub>2</sub>O (+2H<sub>2</sub>O)</b> | 20.8                | 2.0        |
| ETHANOL   | <b>2' + 2H<sub>2</sub>O (+2H<sub>2</sub>O)</b> | 18.5                | -0.4       |
